# Supplementary material for: The effect and mechanisms of risperidone and voluntary exercise intervention on hepatic lipid metabolism in juvenile female rats
Source: Research Square preprint supplement (doi:10.21203/rs.3.rs-7309963/v1), 2025-08-21
Supplement: Supplementary file 1 [file 1ac948a1d744cb81e6e8ca92.docx]

**Supplementary Table 1. Information of antibodies used in Western blot experiments.**

|  | **Antibody** | **LOT** | **Concentration** | **Company** |
| --- | --- | --- | --- | --- |
| **Primary antibodies** | anti-SREBP1 | #ab28481 | 1:500 | Abcam, Cambridge, UK |
| anti-SCD1 | #ab19862 | 1:1000 | Abcam, Cambridge, UK |
| anti-PPARγ | #ab209350 | 1:1000 | Abcam, Cambridge, UK |
| anti-USF1 | #ab180717 | 1:1000 | Abcam, Cambridge, UK |
| anti-ATGL | #ab109251 | 1:1000 | Abcam, Cambridge, UK |
| anti-FSP27 | #ab213693 | 1:1000 | Abcam, Cambridge, UK |
| anti-PGC1α | #ab191838 | 1:1000 | Abcam, Cambridge, UK |
| anti FABP1 | ab222517 | 1:1000 | Abcam, Cambridge, UK |
| anti-FAS | #3180S | 1:1000 | Cell Signaling, Danvers, MA, USA |
| anti-CD36 | #74002 | 1:1000 | Cell Signaling, Danvers, MA, USA |
| anti-SCAP | #13102S | 1:1000 | Cell Signaling, Danvers, MA, USA |
| anti-GAPDH | #5174 | 1:5000 | Cell Signaling, Danvers, MA, USA |
| anti-INSIG2 | #PA5109863 | 1:1000 | Invitrogen, Camarillo, CA, USA |
| anti-FATP2 | #MA5-50447 | 1:1000 | Invitrogen, Camarillo, CA, USA |
| anti-Actin | #mab1501 | 1:5000 | Sigma–Aldrich, St. Louis, MO, USA |
| **Secondary antibodies** | goat anti-rabbit IgG | #7074S | 1:5000 | Cell Signaling, Danvers, MA, USA |
| horse anti-mouse IgG | #7076S | 1:5000 | Cell Signaling, Danvers, MA, USA |
